# Supplementary material
Source: MDPI journal article supplement (https://www.mdpi.com/2227-9717/9/7/1102)
Supplement: s1 [file s1]

# Boosting electrochemical performance of hematite nanorods via quenching-induced alkaline earth metal ion doping

Qin Chen <sup>1</sup>, Yanan Chong <sup>2</sup>, Mumin Rao <sup>3</sup>, and Ming Su <sup>2,\*</sup> Yongcai Qiu <sup>2,\*</sup>

<sup>1</sup> Guangdong Architectural Design and Research Institute Co. Ltd., N0. 97, Liuhua Road, Liwan District, Guangzhou, 510010, China

<sup>2</sup> Guangdong Provincial Key Laboratory of Atmospheric Environment and Pollution Control, School of Environment and Energy, South China University of Technology, Guangzhou, 510006, China

<sup>3</sup> Guangdong Energy Group Science and Technology Research Institute Co.,Ltd, Guangzhou, 511455, China

\* Correspondence: 1029910558@qq.com; ycqiu@scut.edu.cn

Two pieces of 1 cm × 3 cm × 0.25 mm carbon cloth are used in the hydrothermal reaction. It can be seen in the SEM that it is composed of closely arranged carbon fibers interspersed vertically and horizontally.

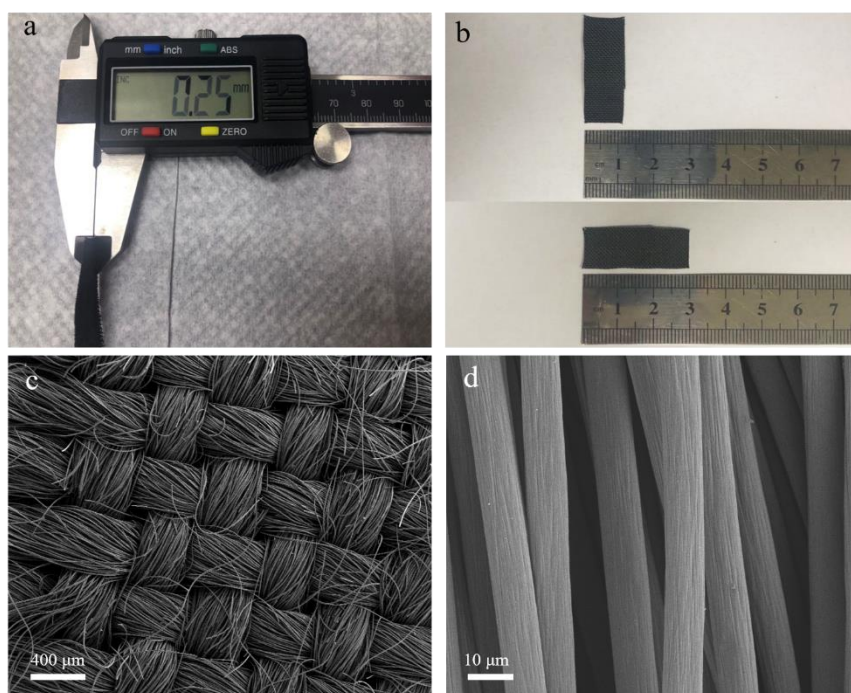

**Figure S1.** Digital photo of (a) the thickness (b) length and width of carbon cloth. (c, d) SEM images of carbon cloth in different magnifications.

We use heat-resistant tape to fix the carbon cloth on the PTFE rod.

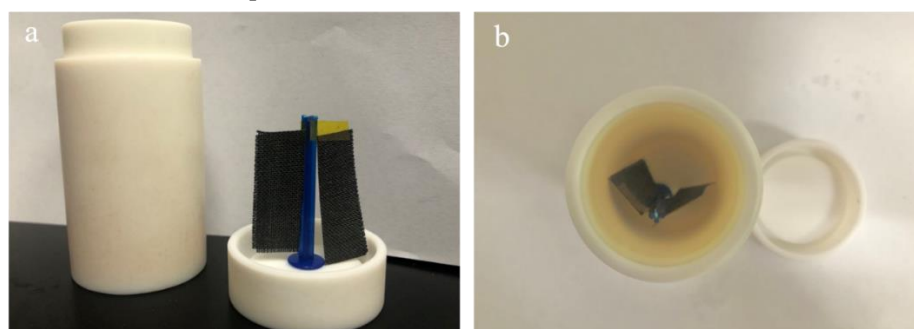

**Figure S2.** Schematic of hydrothermal reaction.

The electrochemical performance of the M-Fe<sub>2</sub>O<sub>3</sub>@CC was characterized using a Bio-logic electrochemical workstation. In half-cell tests, the electrochemical measurements were performed in a standard three-electrode cell with an aqueous 5 M LiCl solution as the electrolyte, a platinum foil as the counter electrode and a saturated calomel electrode (SCE) as the reference electrode. The working electrode consists of M-Fe<sub>2</sub>O<sub>3</sub>@CC (carbon cloth, 1.0 cm × 1.0 cm, Figure S3).

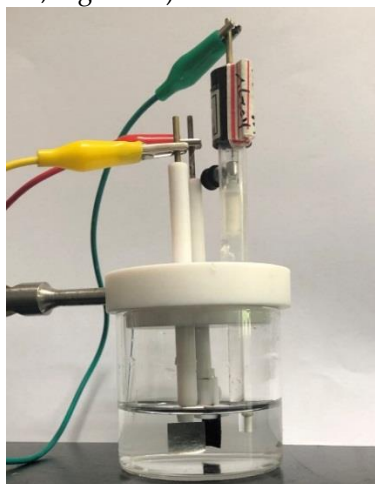**Figure S3.** Schematic of three electrode test.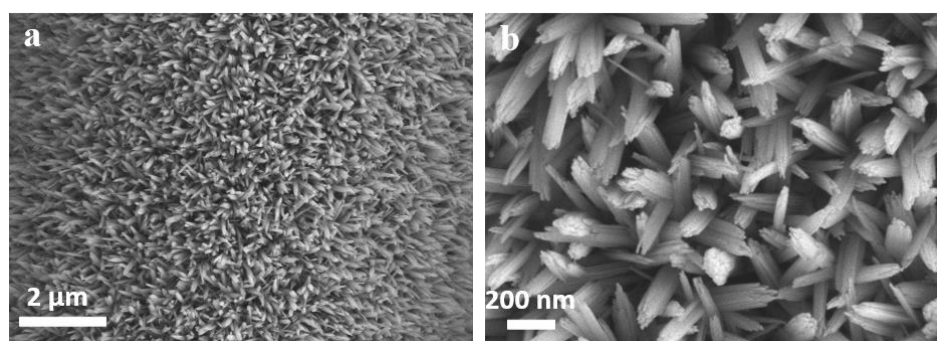**Figure S4.** SEM image of hematite supported on CC.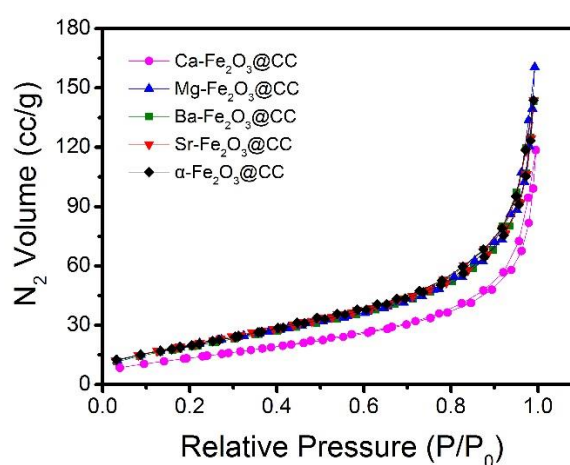

**Figure S5.** Nitrogen adsorption/desorption isotherms for  $\alpha$ -Fe<sub>2</sub>O<sub>3</sub>@CC, Sr-Fe<sub>2</sub>O<sub>3</sub>@CC, Ba-Fe<sub>2</sub>O<sub>3</sub>@CC, Mg-Fe<sub>2</sub>O<sub>3</sub>@CC and Ca-Fe<sub>2</sub>O<sub>3</sub>@CC.
